# Supplementary material for: Ciprofloxacin salts of benzene mono/di-carboxylate: crystal structures and the improvement of solubility
Source: Royal Society of Chemistry journal article supplement (doi:10.1039/d4ce00213j), 2024-01-01
Supplement: d4ce00213j1.pdf [file d4ce00213j1.pdf]

Electronic Supporting Information for

**Ciprofloxacin salts of benzene mono/di-carboxylate: Crystal structures  
and the improvement of solubility**

**Yujun Zhu<sup>a</sup>, Ruoxi Liu<sup>b</sup>, Leyao Wang<sup>b</sup>, Chen Chen<sup>b</sup>, Yupei Zhao<sup>b</sup>, Wei Guo<sup>c,\*</sup>, Zhihui  
Zhang<sup>b,\*</sup>**

*<sup>a</sup>Department of Pharmacy and Biomedical Engineering, Clinical College of Anhui Medical University, Hefei 230031, P.R. China*

*<sup>b</sup>Jiangsu Key Laboratory of Advanced Catalytic Materials and Technology, Advanced Catalysis and Green Manufacturing Collaborative Innovation Center, Changzhou University, Changzhou 213164, P.R. China*

*<sup>c</sup>School of Pharmaceutical Science, Hebei Medical University, Shijiazhuang 050017, P.R. China*

\*Corresponding author. E-mail: zhangzh@cczu.edu.cn (Z.H.Z.) and weiguo@hebmh.edu.cn (W.G.)

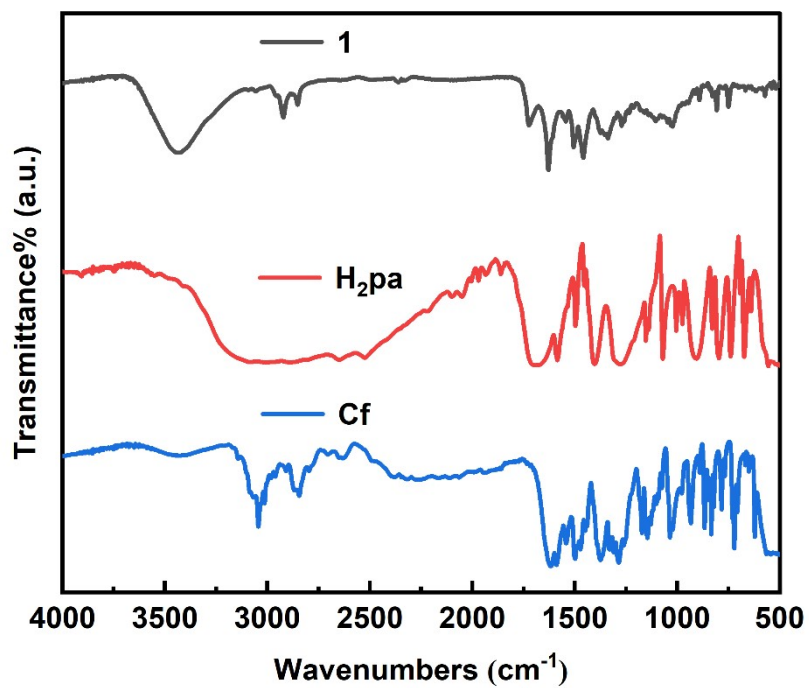

(a)

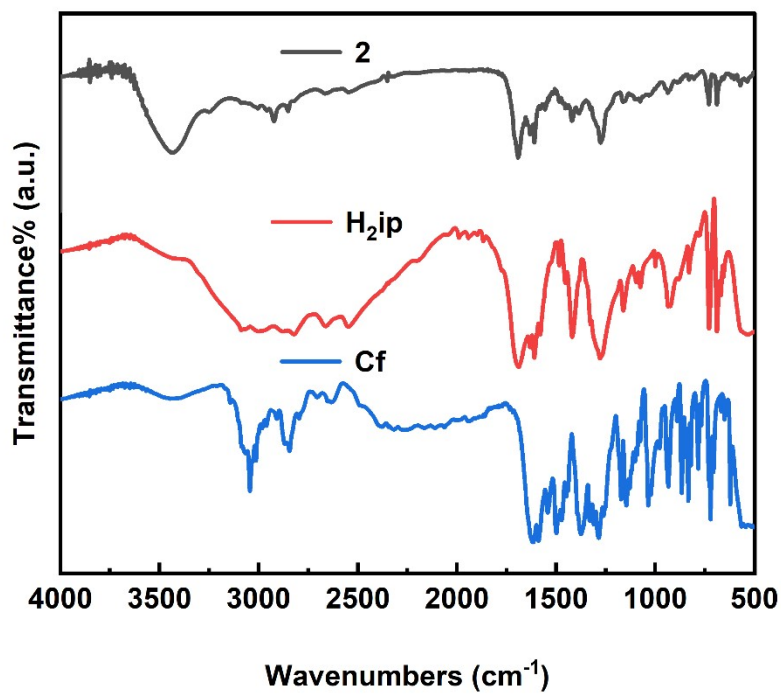

(b)

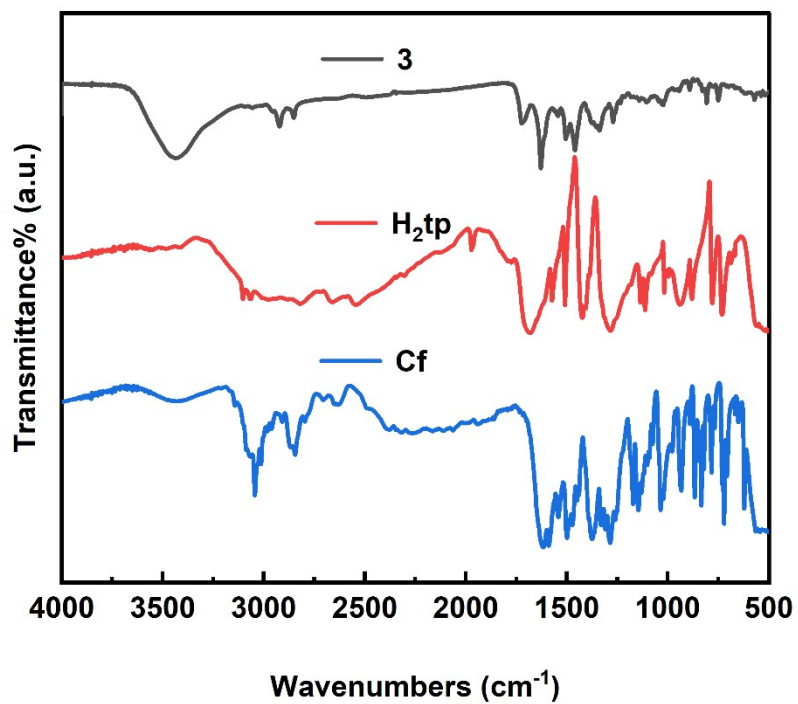

(c)

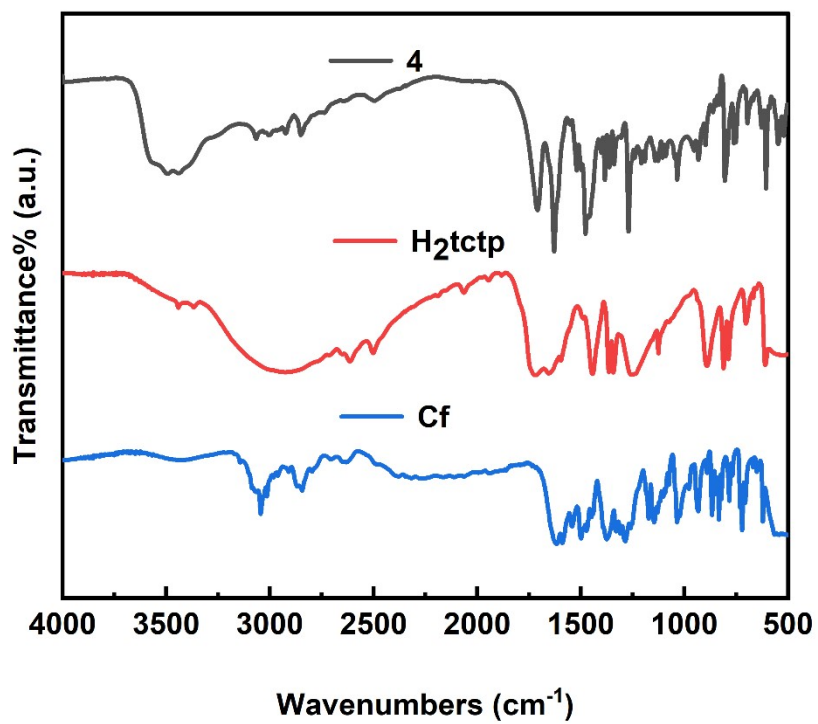

(d)

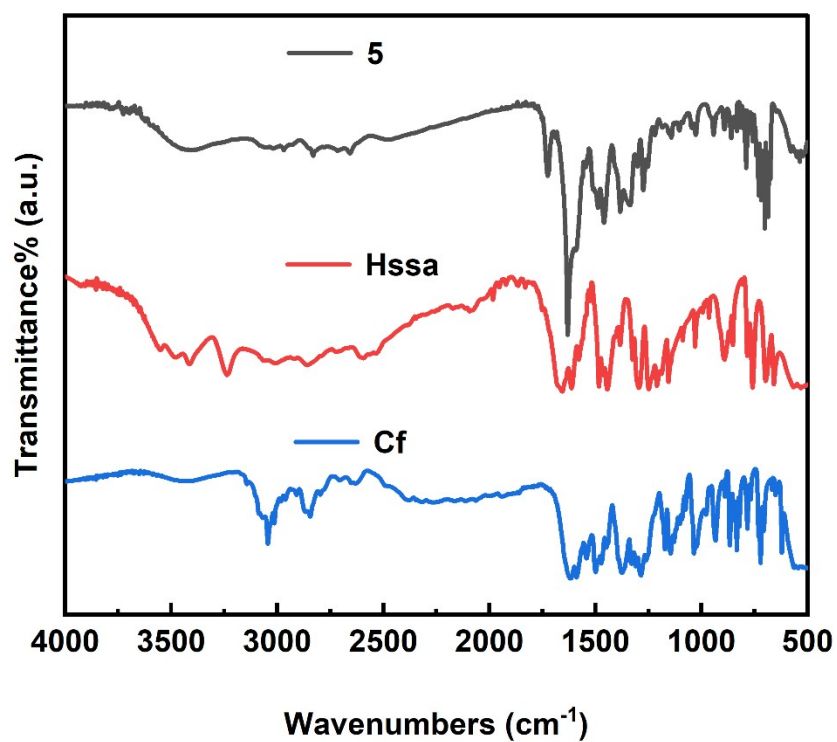

(e)

Fig. S1 Infrared spectra of Cf, cofomers, and 1-5 (a-e)

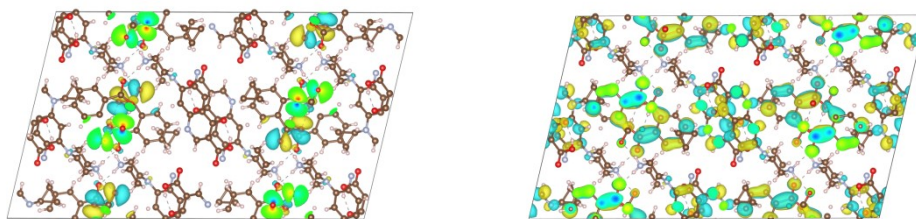

Fig. S2 HOMO (left) and LUMO (right) for 1

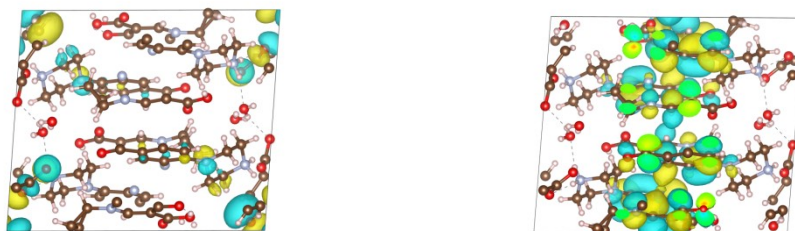

Fig. S3 HOMO (left) and LUMO (right) for 2

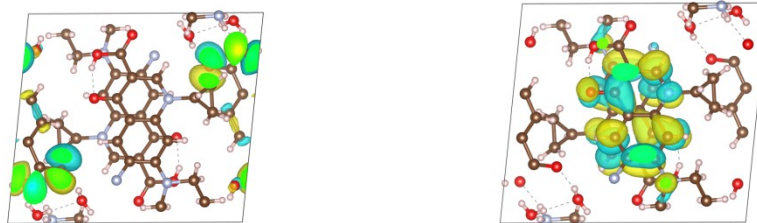

**Fig. S4** HOMO (left) and LUMO (right) for **3**

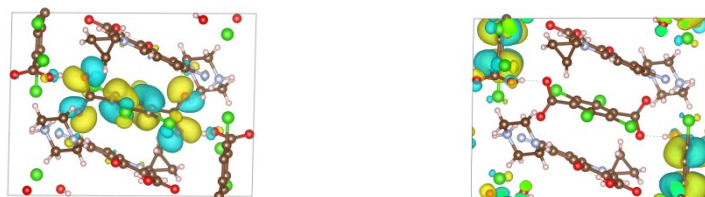

**Fig. S5** HOMO (left) and LUMO (right) for **4**

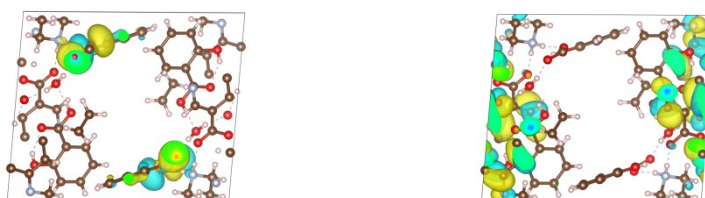

**Fig. S6** HOMO (left) and LUMO (right) for **5**

**Table S1.** Crystal data and structural refinement parameters of salts **1-5**

| Salt                            | <b>1</b>                               | <b>2</b>                                                    | <b>3</b>                                                   | <b>4</b>                                                          | <b>5</b>                                                                        |
|---------------------------------|----------------------------------------|-------------------------------------------------------------|------------------------------------------------------------|-------------------------------------------------------------------|---------------------------------------------------------------------------------|
| Empirical formula               | $C_{25}H_{24}FN_3O_7$                  | $C_{84}H_{94}F_4N_{12}O_{25}$                               | $C_{21}H_{27}N_3O_8F$                                      | $C_{29}H_{21}N_3O_9FCl_6$                                         | $C_{69}H_{70}F_2N_6O_{23}$                                                      |
| Moiety formula                  | $C_{17}H_{19}FN_3O_3$ ,<br>$C_8H_5O_4$ | $4(C_{17}H_{19}FN_3O_3)$ ,<br>$2(C_8H_4O_4)$ ,<br>$5(H_2O)$ | $C_{17}H_{19}FN_3O_3$ ,<br>$0.5(C_8H_4O_4)$ ,<br>$3(H_2O)$ | $C_{17}H_{19}FN_3O_3$ ,<br>$C_8H_2Cl_4O_4$ ,<br>$0.5(C_8Cl_4O_4)$ | $2(C_{17}H_{19}FN_3O_3)$ ,<br>$3(C_7H_6O_3)$ ,<br>$2(C_7H_5O_3)$ ,<br>$2(H_2O)$ |
| Formula weight                  | 497.47                                 | 1747.71                                                     | 468.45                                                     | 787.19                                                            | 1389.31                                                                         |
| Crystal size (mm <sup>3</sup> ) | 0.26×0.21×0.20                         | 0.20 × 0.19 ×<br>0.16                                       | 0.22×0.18×0.15                                             | 0.28×0.22×0.20                                                    | 0.22×0.18×0.16                                                                  |
| Crystal system                  | Monoclinic                             | Triclinic                                                   | Triclinic                                                  | Triclinic                                                         | Triclinic                                                                       |
| Space group                     | <i>C2/c</i>                            | <i>P</i> -1                                                 | <i>P</i> -1                                                | <i>P</i> -1                                                       | <i>P</i> -1                                                                     |
| <i>a</i> (Å)                    | 32.213(12)                             | 10.5368(12)                                                 | 7.311(2)                                                   | 9.2235(8)                                                         | 9.194(3)                                                                        |
| <i>b</i> (Å)                    | 7.738(2)                               | 13.7042(16)                                                 | 11.567(4)                                                  | 11.3207(10)                                                       | 12.720(4)                                                                       |
| <i>c</i> (Å)                    | 19.107(6)                              | 15.0079(17)                                                 | 13.026(4)                                                  | 15.6694(14)                                                       | 14.712(5)                                                                       |

|                                                            |               |               |               |               |               |
|------------------------------------------------------------|---------------|---------------|---------------|---------------|---------------|
| $\alpha$ (°)                                               | 90            | 84.737(2)     | 95.552(8)     | 89.989(2)     | 82.783(9)     |
| $\beta$ (°)                                                | 103.238(10)   | 86.232(2)     | 98.490(8)     | 75.496(2)     | 77.177(9)     |
| $\gamma$ (°)                                               | 90            | 69.254(2)     | 92.972(8)     | 85.944(2)     | 76.989(9)     |
| V (Å <sup>3</sup> )                                        | 4636(3)       | 2016.8(4)     | 1082.0(6)     | 1579.8(2)     | 1629.4(10)    |
| Z                                                          | 8             | 1             | 2             | 2             | 1             |
| $\rho_{calc}$ (g·cm <sup>-3</sup> )                        | 1.425         | 1.439         | 1.438         | 1.655         | 1.416         |
| $\mu$ (mm <sup>-1</sup> )                                  | 0.110         | 0.113         | 0.116         | 0.610         | 0.111         |
| <i>F</i> (000)                                             | 2080          | 918           | 494           | 798           | 728           |
| Reflection collected                                       | 11880         | 14122         | 6128          | 10976         | 9181          |
| Reflection unique                                          | 4079          | 9715          | 3786          | 7598          | 5695          |
| Parameters                                                 | 327           | 580           | 308           | 436           | 488           |
| <i>R</i> <sub>int</sub>                                    | 0.1012        | 0.0219        | 0.0351        | 0.0168        | 0.0291        |
| <i>R</i> <sup>a</sup> / <i>R</i> <sub>w</sub> <sup>b</sup> | 0.1017/0.2705 | 0.0610/0.1871 | 0.0589/0.1741 | 0.0409/0.1204 | 0.0816/0.2455 |
| Goodness-of-fit (GOF) <sup>c</sup>                         | 1.060         | 1.054         | 1.024         | 1.060         | 0.994         |
| $\Delta\rho$ (max/min) (e Å <sup>-3</sup> )                | 0.682/-0.407  | 0.488/-0.355  | 0.411/-0.450  | 0.437/-0.380  | 0.730/-0.414  |

$${}^aR = \Sigma||F_o| - |F_c|| / \Sigma|F_o|; {}^bR_w = [\Sigma[w(F_o^2 - F_c^2)^2] / \Sigma w(F_o^2)^2]^{1/2}. GOF = \{\Sigma [w(F_o^2 - F_c^2)^2] / (n - p)\}^{1/2}$$

**Table S2.** Hydrogen bond geometry for salts **1-5**.

| Salt                       | D—H···A                      | D—H / Å | H···A / Å | D···A / Å | D—H···A / Deg |
|----------------------------|------------------------------|---------|-----------|-----------|---------------|
| <b>1</b>                   | O1—H1···O3                   | 0.82    | 1.77      | 2.525 (6) | 152           |
|                            | N1—H1A···O4 <sup>i</sup>     | 0.89    | 1.85      | 2.726 (7) | 167           |
|                            | N1—H1B···O7 <sup>ii</sup>    | 0.89    | 1.91      | 2.762 (7) | 161           |
|                            | O5—H5···O6                   | 0.82    | 1.61      | 2.387 (7) | 157           |
| <b>2</b>                   | O2—H2···O1                   | 0.82    | 1.80      | 2.558(2)  | 154           |
|                            | N1—H1A···O10                 | 0.89    | 1.98      | 2.848(3)  | 164           |
|                            | N1—H1B···O8 <sup>i</sup>     | 0.89    | 1.85      | 2.635(2)  | 147           |
|                            | O6—H6A···O4                  | 0.82    | 1.75      | 2.517(2)  | 155           |
|                            | N4—H4C···O12 <sup>ii</sup>   | 0.89    | 1.96      | 2.831(3)  | 165           |
|                            | N4—H4D···O10 <sup>iii</sup>  | 0.89    | 1.96      | 2.815(2)  | 161           |
|                            | C20—H20···F2                 | 0.97    | 2.17      | 2.837(3)  | 125           |
|                            | O11—H11A···O9 <sup>iv</sup>  | 0.85    | 1.97      | 2.817(4)  | 179           |
|                            | O11A—H11C···O9 <sup>iv</sup> | 0.85    | 1.96      | 2.808(16) | 174           |
|                            | O12—H12A···O7 <sup>v</sup>   | 0.82    | 2.06      | 2.877(3)  | 174           |
| O12—H12B···O7 <sup>i</sup> | 0.82                         | 2.08    | 2.840(3)  | 153       |               |

|          |                              |      |      |           |     |
|----------|------------------------------|------|------|-----------|-----|
|          | O13—H13A···O10               | 0.82 | 1.91 | 2.662(5)  | 151 |
|          | O13—H13B···O10 <sup>vi</sup> | 0.86 | 1.96 | 2.774(5)  | 156 |
| <b>3</b> | C3—H3A···F1                  | 0.97 | 2.17 | 2.864(5)  | 127 |
|          | N1—H1C···O8 <sup>i</sup>     | 0.89 | 1.94 | 2.821(5)  | 170 |
|          | N1—H1D···O4 <sup>ii</sup>    | 0.89 | 1.80 | 2.656(4)  | 162 |
|          | O2—H2···O1                   | 0.82 | 1.77 | 2.529(4)  | 153 |
|          | O6—H6A···O5                  | 0.85 | 1.91 | 2.742(4)  | 166 |
|          | O7—H7A···O8 <sup>iii</sup>   | 0.85 | 1.95 | 2.769(4)  | 160 |
|          | O7—H7B···O4 <sup>iv</sup>    | 0.85 | 1.98 | 2.830(5)  | 176 |
|          | O8—H8A···O6                  | 0.85 | 1.92 | 2.736(5)  | 161 |
|          | O8—H8B···O7 <sup>v</sup>     | 0.85 | 2.36 | 2.887(6)  | 121 |
| <b>4</b> | N1—H1C···O9 <sup>i</sup>     | 0.89 | 1.96 | 2.794 (3) | 155 |
|          | N1—H1D···O4 <sup>iii</sup>   | 0.89 | 1.87 | 2.755 (3) | 177 |
|          | O2—H2···O1                   | 0.82 | 1.69 | 2.455 (3) | 155 |
|          | O5—H5···O8                   | 0.82 | 1.67 | 2.464 (2) | 162 |
|          | O7—H7A···O3 <sup>ii</sup>    | 0.82 | 1.75 | 2.575 (3) | 178 |
| <b>5</b> | O10—H10B···O5 <sup>i</sup>   | 0.82 | 2.04 | 2.826 (5) | 161 |
|          | O10—H10A···O1 <sup>ii</sup>  | 0.82 | 1.99 | 2.789 (5) | 166 |
|          | O9—H9···O7                   | 0.82 | 1.83 | 2.574 (4) | 150 |
|          | O8—H8···O10                  | 0.82 | 1.76 | 2.571 (4) | 168 |
|          | O6—H6···O5                   | 0.82 | 1.88 | 2.587 (1) | 144 |
|          | O2—H2···O7 <sup>ii</sup>     | 0.82 | 2.46 | 2.871 (5) | 112 |
|          | O2—H2···O1                   | 0.82 | 1.82 | 2.567 (4) | 150 |
|          | N1—H1B···O4 <sup>iii</sup>   | 0.89 | 1.86 | 2.740 (3) | 170 |
|          | N1—H1A···O3 <sup>iv</sup>    | 0.89 | 1.85 | 2.742 (1) | 179 |

Symmetry codes for **1**: (i)  $-x+1/2, y+1/2, -z+1/2$ ; (ii)  $-x+1/2, -y+1/2, -z+1$ . For **2**: (i)  $x-1, y, z$ ; (ii)  $-x+1, -y+1, -z+1$ ; (iii)  $x, y, z+1$ ; (iv)  $-x+1, -y+1, -z$ ; (v)  $-x+2, -y+1, -z$ ; (vi)  $-x+1, -y+2, -z$ . For **3**: (i)  $-x, -y+2, -z+1$ ; (ii)  $-x, -y+2, -z+1$ ; (iii)  $x, y-1, z$ ; (iv)  $-x, -y+1, -z$ ; (v)  $-x+1, -y+1, -z$ . For **4**: (i)  $x+1, y, z$ ; (ii)  $-x+1, -y+1, -z+1$ ; (iii)  $-x+2, -y+1, -z$ . For **5**: (i)  $-x, -y+1, -z+1$ ; (ii)  $-x, -y+1, -z+1$ ; (iii)  $-x, -y, -z+1$ ; (iv)  $x+1, y-1, z$ .
